# Supplementary material
Source: Elsevier journal article supplement (https://www.sciencedirect.com/science/article/pii/S0300893224002707)
Supplement: mmc1 [file mmc1.pdf]

SUPPLEMENTARY DATA

Table 1 of the supplementary data

Baseline characteristics and anatomic features of the fistulas

| Variables                                              | Single fistula<br>(n = 83) | Multiple fistulas<br>(n = 42) | Total<br>(N = 125) | P       |
|--------------------------------------------------------|----------------------------|-------------------------------|--------------------|---------|
| <b>Demographic features</b>                            |                            |                               |                    |         |
| <i>Age, y</i>                                          | 33.58 ± 19.49              | 48.31 ± 18.35                 | 38.53 ± 20.28      | < .001* |
| <i>Age &lt; 18 y</i>                                   | 18 (21.69)                 | 3 (7.14)                      | 21 (16.80)         | .040*   |
| <i>BMI</i>                                             | 29.33 ± 59.42              | 23.29 ± 3.95                  | 27.30 ± 48.46      | .513    |
| <i>Male sex</i>                                        | 34 (40.96)                 | 20 (47.62)                    | 54 (43.20)         | .478    |
| <i>Comorbidities</i>                                   |                            |                               |                    |         |
| Coronary artery disease                                | 4 (4.82)                   | 3 (7.14)                      | 7 (5.60)           | .903    |
| Diabetes                                               | 3 (3.61)                   | 3 (7.14)                      | 6 (4.80)           | .668    |
| Chronic obstructive pulmonary disease                  | 1 (1.20)                   | 3 (7.14)                      | 4 (3.20)           | .214    |
| Hypertension                                           | 9 (10.84)                  | 2 (4.76)                      | 11 (8.80)          | .424    |
| Hyperlipidemia                                         | 6 (7.23)                   | 2 (4.76)                      | 8 (6.40)           | .884    |
| Atrial fibrillation                                    | 1 (1.20)                   | 1 (2.38)                      | 2 (1.60)           | 1.000   |
| <i>Combined congenital heart disease</i>               |                            |                               |                    | .700    |
| <i>Atrial septal defect + patent ductus arteriosus</i> | 1 (1.20)                   | 0 (0.00)                      | 1 (0.80)           |         |
| <i>Single left coronary artery</i>                     | 2 (2.41)                   | 0 (0.00)                      | 2 (1.60)           |         |
| <i>Prior surgery</i>                                   |                            |                               |                    | .061    |
| Percutaneous coronary intervention                     | 2 (2.41)                   | 0 (0.00)                      | 2 (1.60)           |         |
| Patent ductus arteriosus closure                       | 0 (0.00)                   | 2 (4.76)                      | 2 (1.60)           |         |

|                                          |             |             |             |         |
|------------------------------------------|-------------|-------------|-------------|---------|
| Surgical closure of CAF                  | 4 (4.82)    | 0 (0.00)    | 4 (3.20)    |         |
| <b>Chest radiograph</b>                  |             |             |             |         |
| <i>Increased pulmonary perfusion</i>     | 40 (48.19)  | 12 (28.57)  | 52 (41.60)  | .036*   |
| <i>Cardiothoracic ratio</i>              | 0.50 ± 0.06 | 0.47 ± 0.07 | 0.49 ± 0.06 | .031*   |
| <b>Clinical manifestation</b>            |             |             |             |         |
| <i>Asymptomatic</i>                      | 21 (25.30)  | 6 (14.29)   | 27 (21.60)  | .157    |
| <i>Murmur</i>                            | 25 (30.12)  | 3 (7.14)    | 28 (22.40)  | .004*   |
| <i>Chest pain</i>                        | 26 (31.33)  | 25 (59.52)  | 51 (40.80)  | .002*   |
| <i>Palpitation</i>                       | 11 (13.25)  | 4 (9.52)    | 15 (12.00)  | .544    |
| <i>Dyspnea on exertion</i>               | 13 (15.66)  | 15 (35.71)  | 28 (22.40)  | .011*   |
| <i>Infective endocarditis</i>            | 2 (2.41)    | 0 (0.00)    | 2 (1.60)    | .550    |
| <b>Anatomic features of the fistulas</b> |             |             |             |         |
| <i>Origin site</i>                       |             |             |             | < .001  |
| LAD                                      | 11 (13.25)  | 3 (7.14)    | 14 (11.20)  |         |
| LAD+LCX                                  | 0 (0.00)    | 5 (11.90)   | 5 (4.00)    |         |
| LAD+LCX+RCA                              | 0 (0.00)    | 1 (2.38)    | 1 (0.80)    |         |
| LCX                                      | 20 (24.10)  | 3 (7.14)    | 23 (18.40)  |         |
| LM                                       | 5 (6.02)    | 0 (0.00)    | 5 (4.00)    |         |
| LM+LCX                                   | 0 (0.00)    | 1 (2.38)    | 1 (0.80)    |         |
| LM+RCA                                   | 0 (0.00)    | 3 (7.14)    | 3 (2.40)    |         |
| RCA                                      | 47 (56.63)  | 8 (19.05)   | 55 (44.00)  |         |
| RCA+LAD                                  | 0 (0.00)    | 14 (33.33)  | 14 (11.20)  |         |
| RCA+LCX                                  | 0 (0.00)    | 4 (9.52)    | 4 (3.20)    |         |
| <i>Type of CAF</i>                       |             |             |             | < .001* |
| Coronary-cameral fistulas                | 68 (81.93)  | 12 (28.57)  | 80 (64.00)  |         |

|                                      |             |             |             |         |
|--------------------------------------|-------------|-------------|-------------|---------|
| Coronary-pulmonary artery fistulas   | 15 (18.07)  | 30 (71.43)  | 45 (36.00)  |         |
| <i>Proximity of origin</i>           |             |             |             | .055    |
| Proximal                             | 55 (66.27)  | 28 (66.67)  | 83 (66.40)  |         |
| Distal                               | 28 (33.73)  | 11 (26.19)  | 39 (31.20)  |         |
| Distal + proximal                    | 0           | 3 (7.14)    | 3 (2.40)    |         |
| <i>Terminations</i>                  |             |             |             | < .001* |
| Coronary sinus                       | 4 (4.82)    | 0 (0.00)    | 4 (3.20)    |         |
| Left atrium                          | 1 (1.20)    | 1 (2.38)    | 2 (1.60)    |         |
| Left ventricle                       | 27 (32.53)  | 5 (11.90)   | 32 (25.60)  |         |
| Pulmonary artery                     | 15 (18.07)  | 30 (71.43)  | 45 (36.00)  |         |
| Right atrium                         | 18 (21.69)  | 4 (9.52)    | 22 (17.60)  |         |
| Right ventricle                      | 17 (20.48)  | 2 (4.76)    | 19 (15.20)  |         |
| Superior vena cava                   | 1 (1.20)    | 0 (0.00)    | 1 (0.80)    |         |
| <i>Plexus-like</i>                   | 1 (1.20)    | 15 (35.71)  | 16 (12.80)  | < .001* |
| <i>Coronary artery dilation</i>      |             |             |             | .002*   |
| Segmental dilation                   | 47 (56.63)  | 15 (35.71)  | 62 (49.60)  |         |
| Diffuse dilation                     | 17 (20.48)  | 4 (9.52)    | 21 (16.80)  |         |
| <i>Aneurysm</i>                      | 53 (63.86)  | 15 (35.71)  | 68 (54.40)  | .003*   |
| <i>Giant aneurysm</i>                | 27 (32.53)  | 5 (11.90)   | 32 (25.60)  | .013*   |
| <i>Diameter of draining site, mm</i> | 6.70 ± 3.94 | 4.82 ± 2.37 | 6.07 ± 3.59 | .001    |
| <i>Size</i>                          |             |             |             | < .001* |
| Large                                | 58 (69.88)  | 15 (35.71)  | 73 (58.40)  |         |
| Medium                               | 19 (22.89)  | 25 (59.52)  | 44 (35.20)  |         |
| Small                                | 6 (7.23)    | 2 (4.76)    | 8 (6.40)    |         |

LAD, left anterior descending branch; LCX, left circumflex branch; LM, left main coronary artery;

RCA, right coronary artery.

The data are presented as No. (%) or mean  $\pm$  standard deviation.

\* Statistically significant intergroup differences.
